# Supplementary material
Source: MDPI journal article supplement (https://www.mdpi.com/2077-0472/8/4/50)
Supplement: s1 [file s1]

[Supplemental figures and tables]

**Table S1.** Distribution of fertilizer-derived N before cultivation and at the harvesting stage

| Timing                | Site   | Fertilizer | Percentage of fertilizer-derived N (%) |              |              |                |              |
|-----------------------|--------|------------|----------------------------------------|--------------|--------------|----------------|--------------|
|                       |        |            | Plant                                  | Rice straw   | Labile N     | Recalcitrant N | Loss         |
| Before<br>cultivation | Akita  | AS         | -                                      | 8.96 ± 0.29  | 8.48 ± 1.28  | 23.61 ± 3.77   | 58.95 ± 4.94 |
|                       |        | LN         | -                                      | 11.59 ± 1.07 | 9.87 ± 0.51  | 33.25 ± 2.87   | 45.28 ± 3.22 |
|                       | Miyagi | AS         | -                                      | 5.09 ± 0.53  | 17.96 ± 1.67 | 40.05 ± 4.24   | 36.90 ± 5.75 |
|                       |        | LN         | -                                      | 4.93 ± 0.44  | 18.34 ± 1.42 | 49.22 ± 4.78   | 27.92 ± 5.57 |
| Harvesting            | Akita  | AS         | 3.44 ± 0.16                            | -            | 5.14 ± 0.42  | 26.66 ± 1.01   | 64.76 ± 0.97 |
|                       |        | LN         | 4.86 ± 0.17                            | -            | 8.06 ± 0.23  | 35.14 ± 2.65   | 51.94 ± 2.34 |
|                       | Miyagi | AS         | 5.25 ± 0.12                            | -            | 9.80 ± 0.27  | 25.96 ± 1.01   | 58.99 ± 1.35 |
|                       |        | LN         | 6.19 ± 0.05                            | -            | 13.16 ± 0.57 | 45.27 ± 2.84   | 35.38 ± 2.61 |

Mean ± standard error ( $n = 4$ ). AS, ammonium sulfate; LN, lime nitrogen.
